# Supplementary material for: Soil erosion evolution and spatial correlation analysis in a typical karst geomorphology, using RUSLE with GIS
Source: Copernicus journal article supplement (doi:10.5194/se-2017-1), 2017-01-16
Supplement: Supplementary file 1 [file se-2017-1-supplement.zip]

**Table 1.** The rainfall erosivity factor (*R*) in Yinjiang during the study periods

| Year | Annual rainfall (mm) | The annual rainfall erosivity [ $\text{MJ}\cdot\text{mm}\cdot\text{hm}^{-2}\cdot\text{h}^{-1}\cdot\text{a}^{-1}$ ] |
|------|----------------------|--------------------------------------------------------------------------------------------------------------------|
| 2000 | 1121.03              | 3183.25                                                                                                            |
| 2005 | 884.23               | 2460.92                                                                                                            |
| 2013 | 734.39               | 2003.93                                                                                                            |

**Table 2.** Soil and water conservation measure factors in Yinjiang County

| Land use<br>types | Forest | Grassland | Cropland | Paddy<br>field | Town | Village | Road | Waters | Unused<br>land |
|-------------------|--------|-----------|----------|----------------|------|---------|------|--------|----------------|
| p                 | 1      | 1         | 0.4      | 0.15           | 0    | 0       | 0    | 0      | 1              |

**Table 3.** Conditions of soil erosion in Yinjiang in different periods

|      | Erosion rating | Erosion<br>area(ha) | Total soil<br>loss( $\times 10^4$ t) | Average modulus<br>( $t \cdot ha^{-1} \cdot yr^{-1}$ ) | area<br>ratio(%) | Erosion<br>ratio(%) |
|------|----------------|---------------------|--------------------------------------|--------------------------------------------------------|------------------|---------------------|
| 2000 | Micro-degree   | 36187               | 8.47                                 | 2.30                                                   | 28.97            | 1.77                |
|      | Mild           | 87470               | 126.25                               | 126                                                    | 39.99            | 26.44               |
|      | Moderate       | 40506               | 146.58                               | 36.11                                                  | 19.27            | 30.70               |
|      | Strong         | 15719               | 98.88                                | 62.88                                                  | 7.78             | 20.71               |
|      | Pole strong    | 7153                | 73.73                                | 103.30                                                 | 3.46             | 15.44               |
|      | Violent        | 1244                | 23.57                                | 184.80                                                 | 0.54             | 4.94                |
| 2005 | Micro-degree   | 56529               | 9.74                                 | 2.35                                                   | 30.27            | 2.66                |
|      | Mild           | 84898               | 117.30                               | 13.92                                                  | 43.90            | 32.00               |
|      | Moderate       | 34362               | 120.91                               | 35.23                                                  | 17.76            | 32.99               |
|      | Strong         | 10929               | 67.95                                | 62.17                                                  | 5.65             | 18.54               |
|      | Pole strong    | 4352                | 44.67                                | 102.70                                                 | 2.25             | 12.19               |
|      | Violent        | 338                 | 5.99                                 | 177.59                                                 | 0.17             | 1.64                |
| 2013 | Micro-degree   | 63544               | 10.57                                | 2.32                                                   | 34.21            | 3.36                |
|      | Mild           | 85610               | 117.63                               | 13.83                                                  | 44.29            | 37.42               |
|      | Moderate       | 30801               | 107.54                               | 34.97                                                  | 15.92            | 34.21               |
|      | Strong         | 8010                | 49.73                                | 62.11                                                  | 4.14             | 15.82               |
|      | Pole strong    | 2663                | 26.76                                | 100.52                                                 | 1.38             | 8.51                |
|      | Violent        | 125                 | 2.11                                 | 168.55                                                 | 0.065            | 0.67                |

**Table 4.** The intensity variation of the soil erosion in the study area

|           | Grade shifting of soil erosion intensity(%) |       |       |      |      |       |       |       |      |      |
|-----------|---------------------------------------------|-------|-------|------|------|-------|-------|-------|------|------|
|           | 0                                           | 1     | 2     | 3    | 4    | -1    | -2    | -3    | -4   | -5   |
| 2000-2005 | 22.76                                       | 15.23 | 13.07 | 4.33 | 1.05 | 24.22 | 8.52  | 9.50  | 1.09 | 0.24 |
| 2005-2013 | 23.19                                       | 17.77 | 21.15 | 1.02 | 0.26 | 13.93 | 14.28 | 6.19  | 2.11 | 0.08 |
| 2000-2013 | 19.74                                       | 18.33 | 10.21 | 2.47 | 0.59 | 19.10 | 10.96 | 15.61 | 2.70 | 0.29 |

Note: 0 refers to the unchanged soil erosion intensity; 1 refers to the soil erosion intensity increased by one level; 2 refers to the soil erosion intensity increased by two levels; 3 refers to the soil erosion intensity increased by three levels; 4 refers to the soil erosion intensity increased by four levels; 5 refers to the soil erosion intensity increased by five levels; -1 refers to the soil erosion intensity decreased by one level; -2 refers to the soil erosion intensity decreased by two levels; -3 refers to the soil erosion intensity decreased by three levels; -4 refers to the soil erosion intensity decreased by four levels; and -5 refers to the soil erosion intensity decreased by five levels.

**Table 5.** Soil erosion conditions in different slope grades

| Slope                      | Average modulus( $\text{t}\cdot\text{ha}^{-1}\cdot\text{yr}^{-1}$ ) | Area ratio(%) | Erosion ratio(%) |
|----------------------------|---------------------------------------------------------------------|---------------|------------------|
| $<5^\circ$                 | 15.32                                                               | 9.68          | 10.85            |
| $5^\circ\text{-}8^\circ$   | 13.31                                                               | 4.76          | 17.32            |
| $8^\circ\text{-}15^\circ$  | 15.33                                                               | 12.94         | 18.09            |
| $15^\circ\text{-}25^\circ$ | 17.56                                                               | 33.31         | 19.68            |
| $25^\circ\text{-}35^\circ$ | 18.54                                                               | 27.28         | 20.72            |
| $>35^\circ$                | 20.15                                                               | 12.03         | 13.33            |

**Table 6.** Annual erosion rates in different outcrop areas of rocks

|      | Average soil erosion rate(t·ha <sup>-1</sup> ·yr <sup>-1</sup> ) |             |       |       |       |       |       |
|------|------------------------------------------------------------------|-------------|-------|-------|-------|-------|-------|
|      | Non-carbonatite                                                  | carbonatite | HD    | HL    | MHLD  | CRLI  | ILCR  |
| 2000 | 26.67                                                            | 25.48       | 30.30 | 23.77 | 24.34 | 21.78 | 25.25 |
| 2005 | 21.79                                                            | 21.82       | 22.26 | 21.86 | 27.44 | 19.10 | 23.03 |
| 2013 | 18.45                                                            | 19.29       | 18.06 | 19.97 | 23.06 | 17.40 | 20.94 |

**Table 7.** Annual erosion rate in different desertification grades

|      | Average soil erosion rate( $\text{t} \cdot \text{ha}^{-1} \cdot \text{yr}^{-1}$ ) |          |         |             |           |           |
|------|-----------------------------------------------------------------------------------|----------|---------|-------------|-----------|-----------|
|      | None RD                                                                           | Micro RD | Mild RD | Moderate RD | Severe RD | Non-karst |
| 2000 | 30.46                                                                             | 25.40    | 21.48   | 18.54       | 9.71      | 25.93     |
| 2005 | 22.17                                                                             | 21.79    | 20.09   | 18.57       | 8.98      | 21.74     |
| 2013 | 18.47                                                                             | 19.17    | 18.28   | 16.86       | 11.56     | 18.51     |
