# Supplementary material for: Soil erosion evolution and spatial correlation analysis in a typical karst geomorphology, using RUSLE with GIS
Source: Copernicus journal article supplement (doi:10.5194/se-2017-1), 2017-01-16
Supplement: Supplementary file 2 [file se-2017-1-supplement.zip]

Archive with 2 entries (2 files):
- Tables.pdf
- Figures.pdf
