# Supplementary material for: Soil erosion evolution and spatial correlation analysis in a typical karst geomorphology, using RUSLE with GIS
Source: Copernicus journal article supplement (doi:10.5194/se-2017-1), 2017-01-16
Supplement: Supplementary file 2 [file se-2017-1-supplement.zip › Figures.pdf]

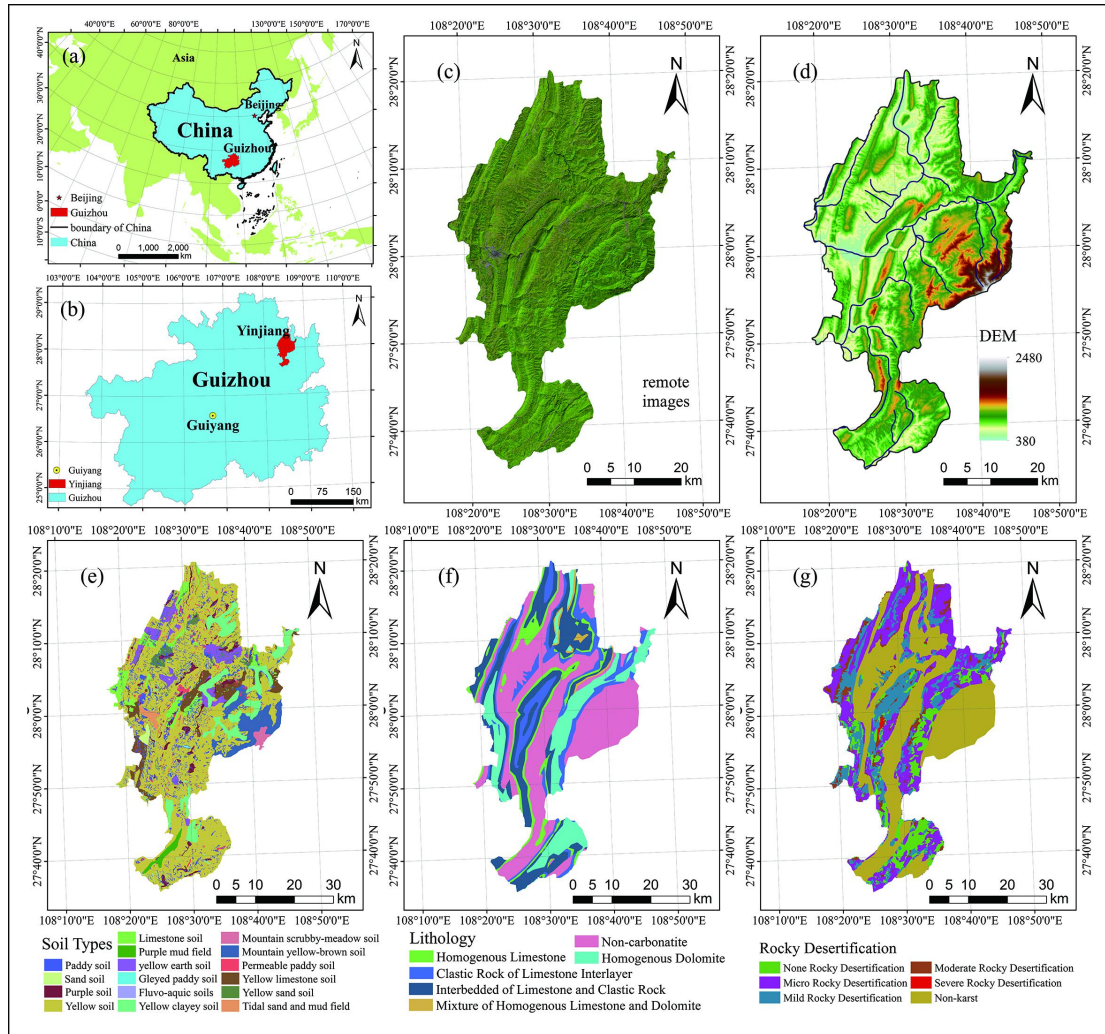

**Figure 1.** Study area location in Guizhou, China (a)(b), Study area remote images(c), Topography (d), Soil map (e), Lithology (f) and Rocky desertification (g)

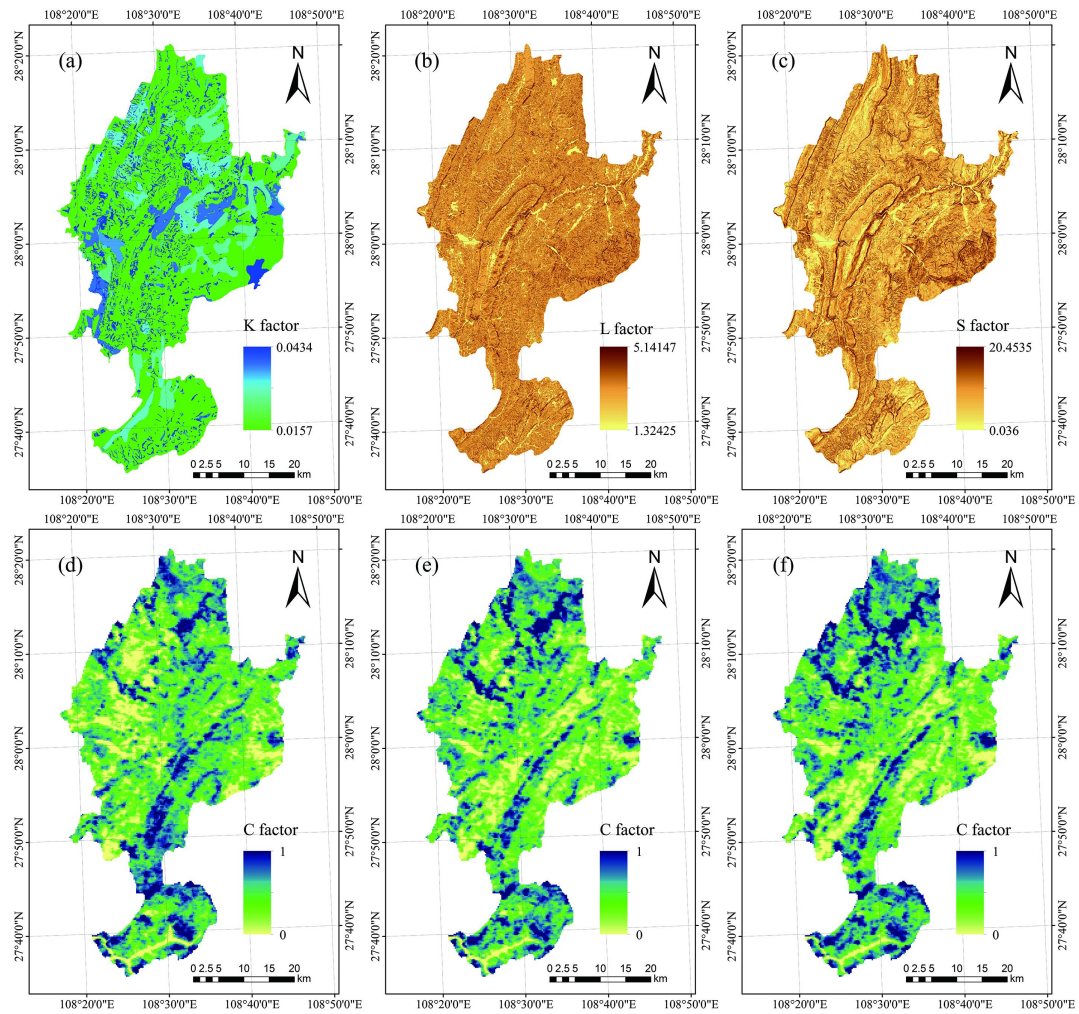

**Figure 2.** Soil Erodibility map(a), Slope Length Factor map(b), Slope Gradient Factor map(c), 2000 Cover Management Factor map(d), 2005 Cover Management Factor map(e), 2013 Cover Management Factor map(f)

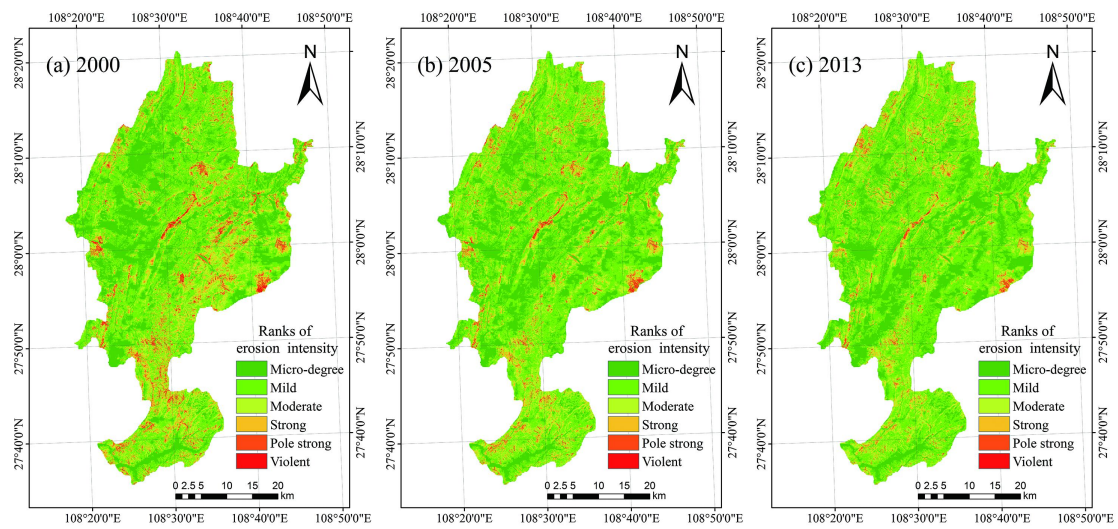

**Figure 3.** Spatial distribution of soil erosion in Yinjiang in different periods

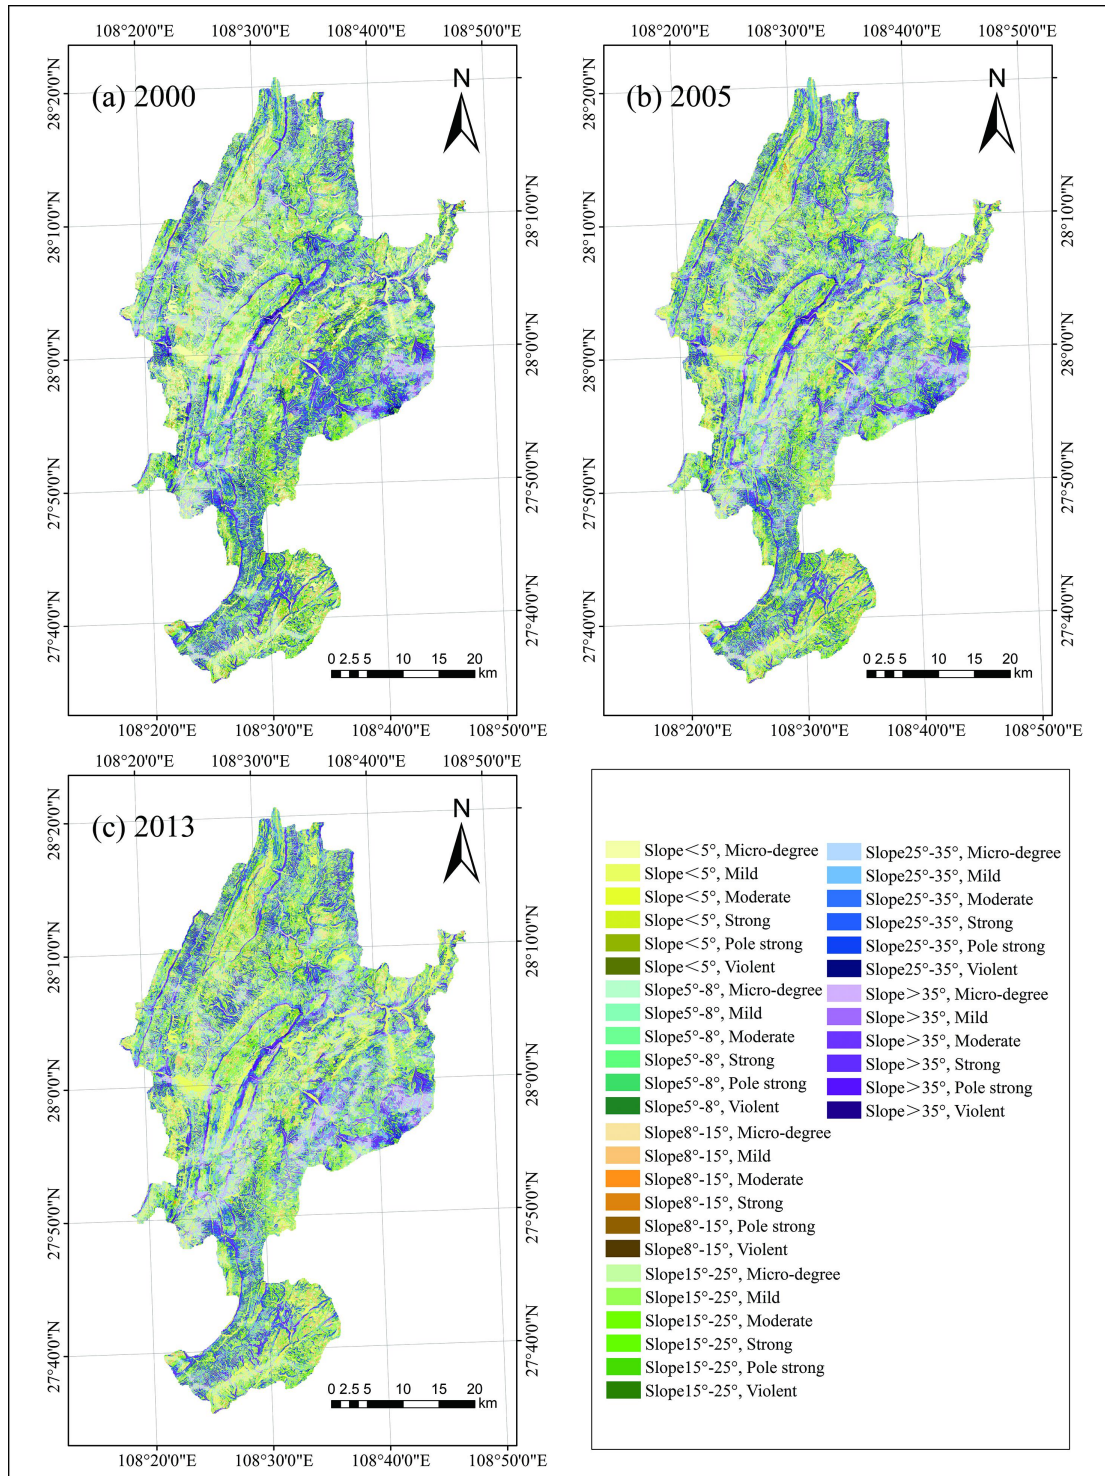

**Figure 4.** Spatial distribution of soil erosion in different slope band

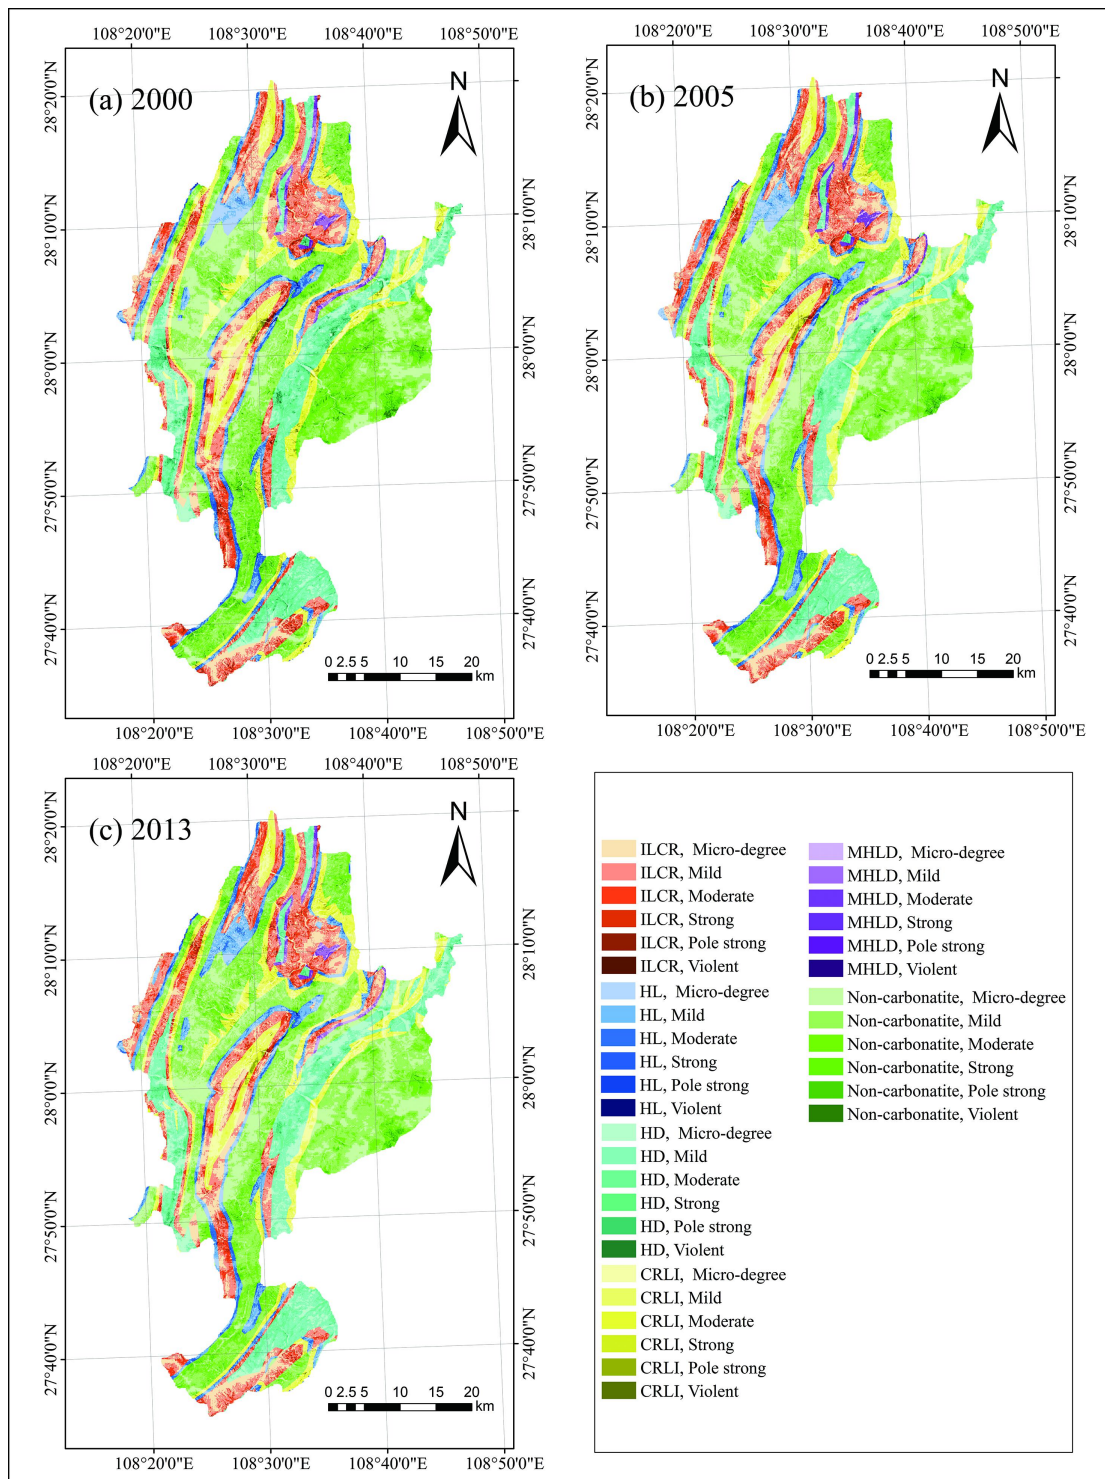

**Figure5.** Spatial distribution of soil erosion in different outcrop areas of rocks

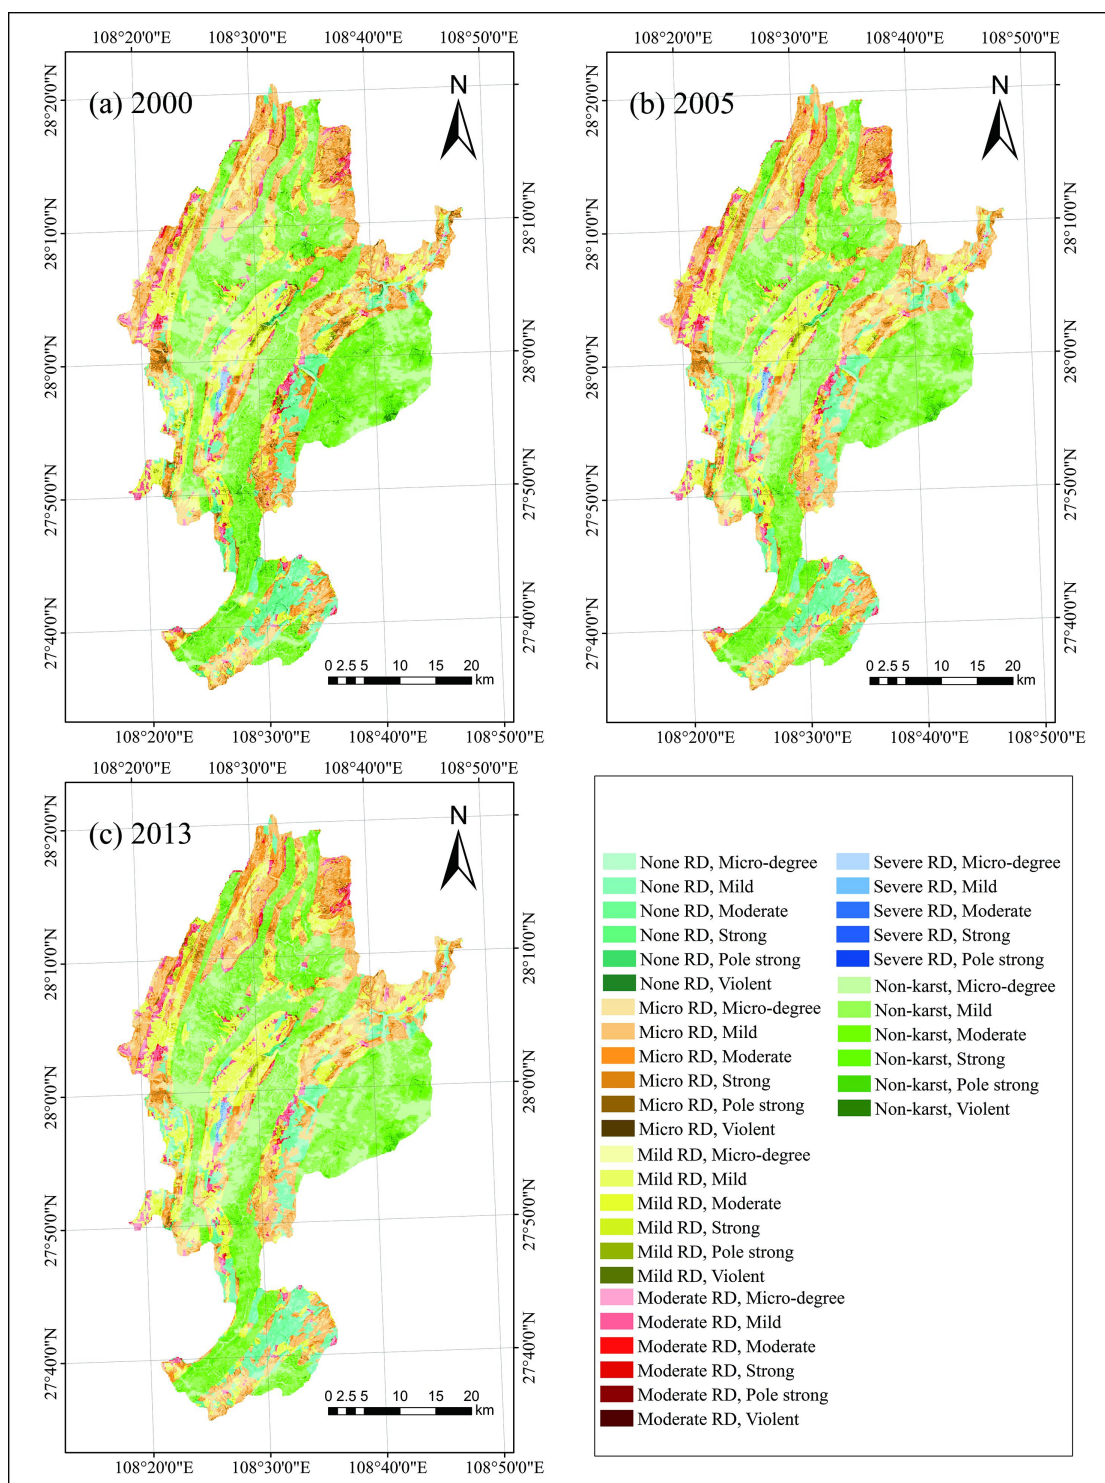

**Figure 6.** Spatial distribution of soil erosion in different desertification grades
