# Supplementary material for: Soil erosion evolution and spatial correlation analysis in a typical karst geomorphology, using RUSLE with GIS
Source: Copernicus journal article supplement (doi:10.5194/se-2017-1), 2017-01-16
Supplement: Supplementary file [file se-2017-1-AC3-supplement.pdf]

### 5.3 Modulus of Different Soil Erosion Statistics in Karst

AreasThe RUSLE model is one of the classical models of soil erosion and is widely used in various countries and regions in the world. However, although the RUSLE model is a mature and classical model, its application in karst areas is relatively scarce. Several scientists have conducted research on different parts of the karst areas of Guizhou Province. Different results have been derived; thus, a simple control should be adopted, and their results are given in Table 8.

**Table 8 .**The different data of soil erosion obtained by previous studiesin typical Karst area

| The main author | Study area             | Time scale | Average modulus<br>(t·hm <sup>-2</sup> ·yr <sup>-1</sup> ) | Total soil loss<br>(×10 <sup>4</sup> t) |
|-----------------|------------------------|------------|------------------------------------------------------------|-----------------------------------------|
| Zeng(2011)      | Hongfenghu<br>Basin    | 1960-1986  | 38.35                                                      | 610.53                                  |
|                 |                        | 1987-1997  | 52.80                                                      | 839.90                                  |
|                 |                        | 1998-2004  | 40.24                                                      | 640.18                                  |
| Xu(2011)        | Maotiao River<br>Basin | 2002       | 28.70                                                      | 875.65                                  |
| Wang(2014)      | Wujiang River<br>Basin | 1980-1989  | 26.78                                                      | 133.36                                  |
|                 |                        | 1990-1999  | 23.13                                                      | 115.18                                  |
| This paper      | Yinjiang Country       | 2000       | 25.09                                                      | 477.49                                  |
|                 |                        | 2005       | 21.53                                                      | 366.56                                  |
|                 |                        | 2013       | 18.84                                                      | 314.64                                  |
